# Supplementary material for: Monitoring of Ex Vivo Cyclosporin a Activity in Healthy Volunteers Using T Cell Function Assays in Relation to Whole Blood and Cellular Pharmacokinetics
Source: MDPI journal article supplement (doi:10.3390/pharmaceutics14091958), 2022-09-16
Supplement: s1 [file s1]

## Supplementary material

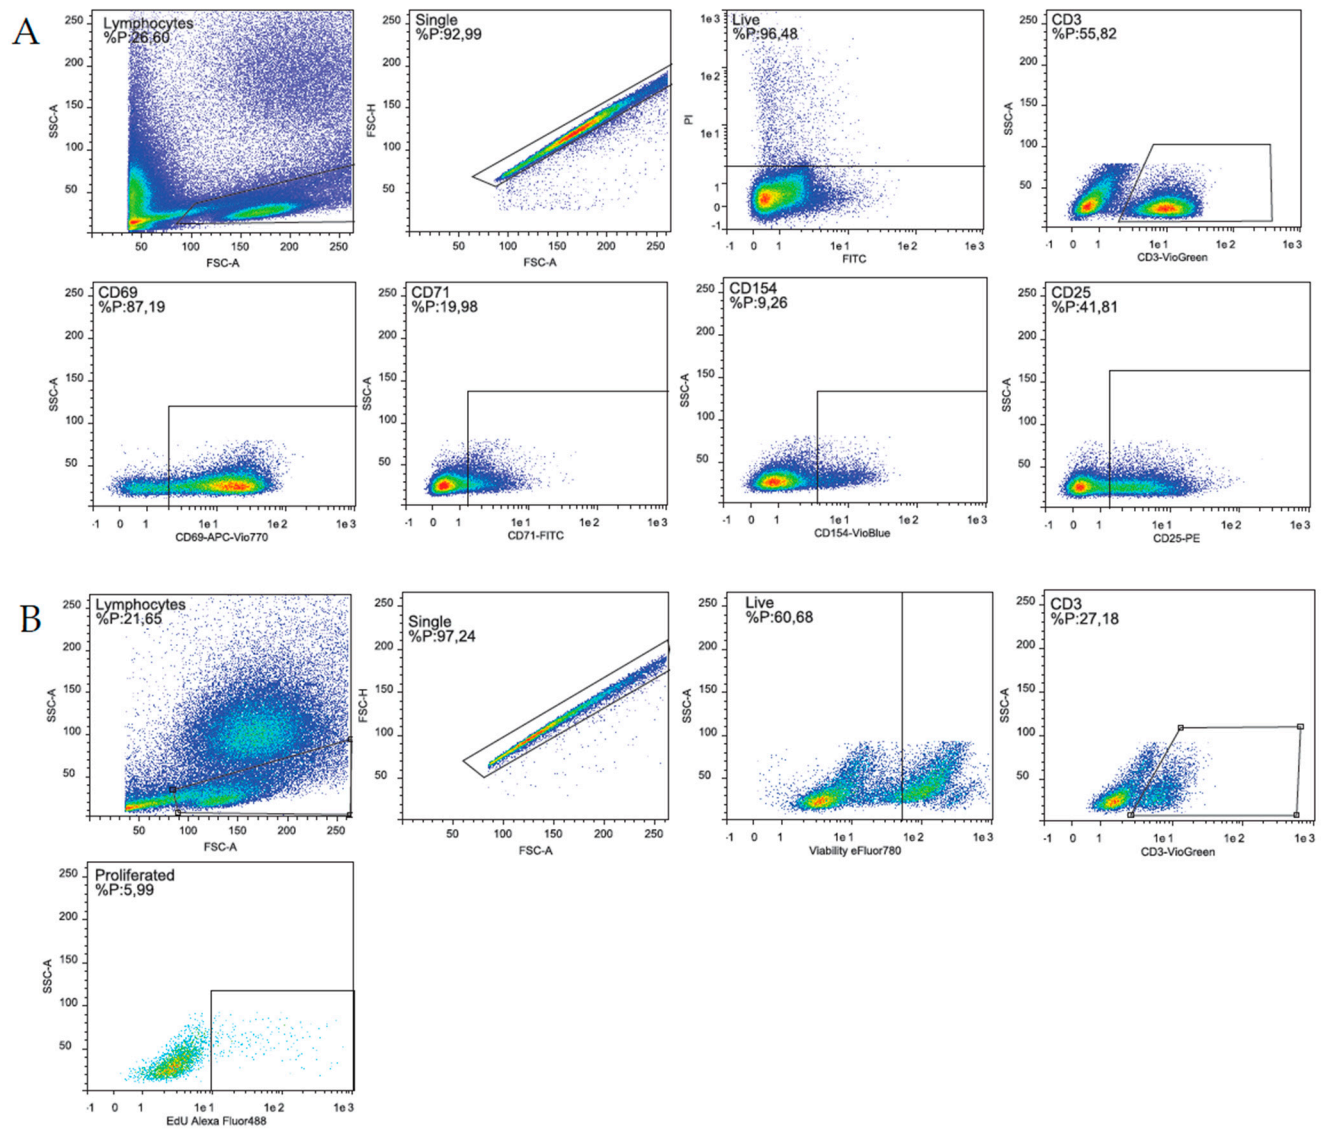

**Figure S1:** Gating strategy of T cell activation marker expression (A) and T cell proliferation (B)

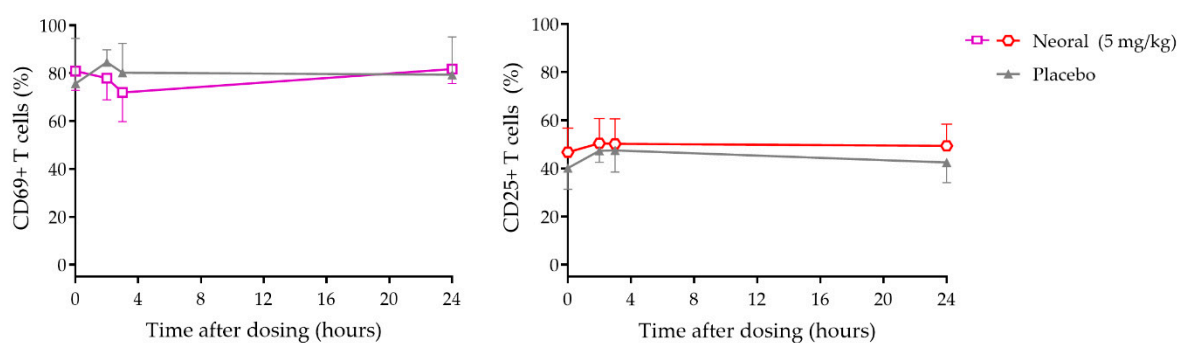

**Figure S2:** *Ex vivo* T cell activation marker expression after a single dose of 5 mg/kg Neoral or placebo

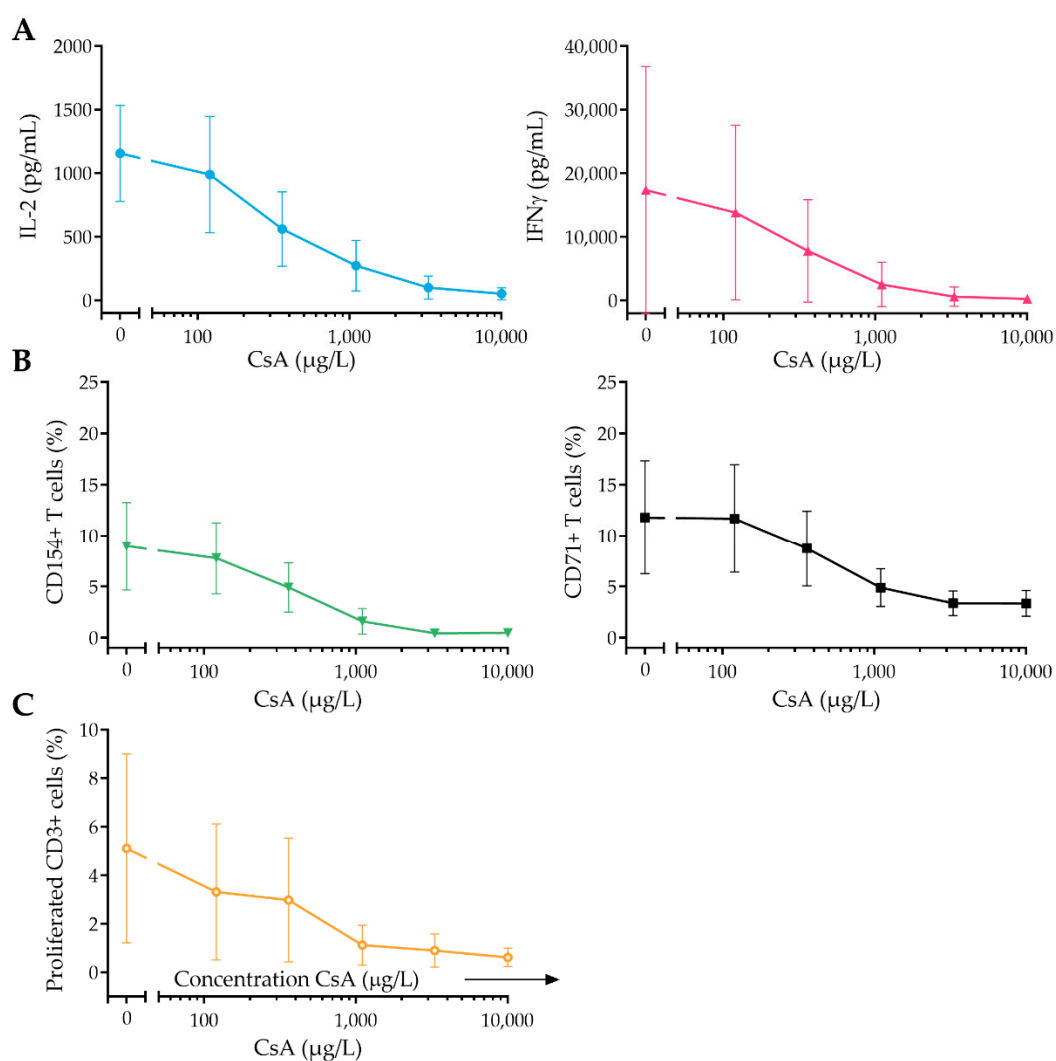

**Figure S3:** *In vitro* dose effect of CsA on cytokine production, T cell activation marker expression and T cell proliferation.
